# Supplementary material for: Integration of Adenylate Kinase 1 with Its Peptide Conformational Imprint
Source: MDPI journal article supplement (doi:10.3390/ijms23126521), 2022-06-10
Supplement: s1 [file s1]

## Supporting information

### Integration of adenylate kinase 1 with its peptide conformational imprint

Cheng-Hsin Wu <sup>1</sup>, Chung-Yin Lin <sup>2,3,\*</sup>, Tzu-Chieh Lin <sup>1</sup>, and Dar-Fu Tai <sup>1,\*</sup>

<sup>1</sup> Department of Chemistry, National Dong Hwa University, Hualien 97403, Taiwan; m9812022@gms.ndhu.edu.tw (C-H.W.); m9812012@gms.ndhu.edu.tw (T-C.L.); dftai@gms.ndhu.edu.tw (D-F.T.)

<sup>2</sup> Medical Imaging Research Center, Institute for Radiological Research, Chang Gung University, Taoyuan 33302, Taiwan; winwood7@mail.cgu.edu.tw (C-Y.L.)

<sup>3</sup> Department of Nephrology and Clinical Poison Center, Chang Gung Memorial Hospital, Taoyuan 33302, Taiwan

\*Correspondence: winwood7@mail.cgu.edu.tw (C-Y.L.); dftai@gms.ndhu.edu.tw (D-F.T.); Tel.: +886-3-211-8800 (ext. 3865) (C-Y.L.)

## Results and Discussion

### *Synthesis and properties of the 15-mer AK1 templates*

#### Characterization of AK1<sub>9-23</sub> (KIIFVVGGPGSGKGT)

The HPLC chromatogram revealed a sharp AK1<sub>9-23</sub> peak at a retention time of ~3.3 min and purity was calculated to be ~81% as compared to standards (Figure S1). The sequence being KIIFVVGGPGSGKGT has a reported m/z value of AK1<sub>9-23</sub> at 1,417.73 g·mol<sup>-1</sup> (Figure S2). The CD analysis of synthetic AK1<sub>9-23</sub> segment in aqueous solution showed a typical spectrum of disordered structure (Figure S3). The proportion of the sequence **assumed** random-coil or  $\beta$ -sheet secondary structure in the different solvent environments, showing a general predominance of random-coil and  $\beta$ -sheet conformation.

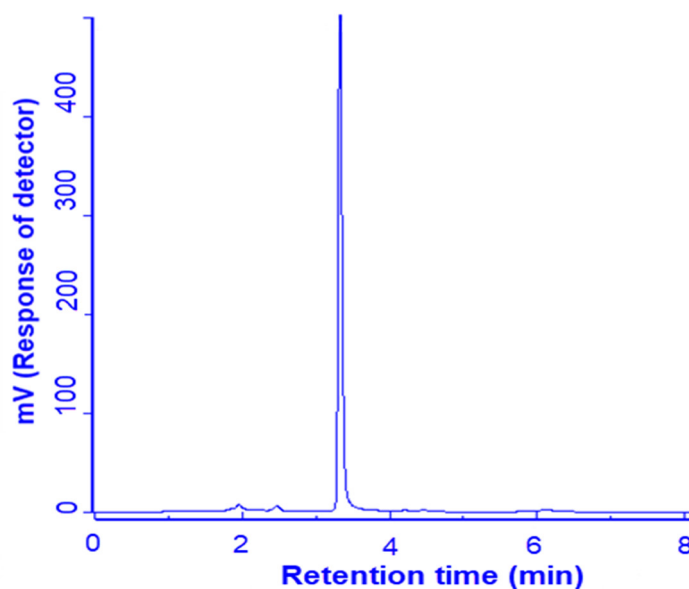

**Figure S1.** HPLC chromatogram of AK1<sub>9-23</sub> (KIIFVVGGPGSGKGT).

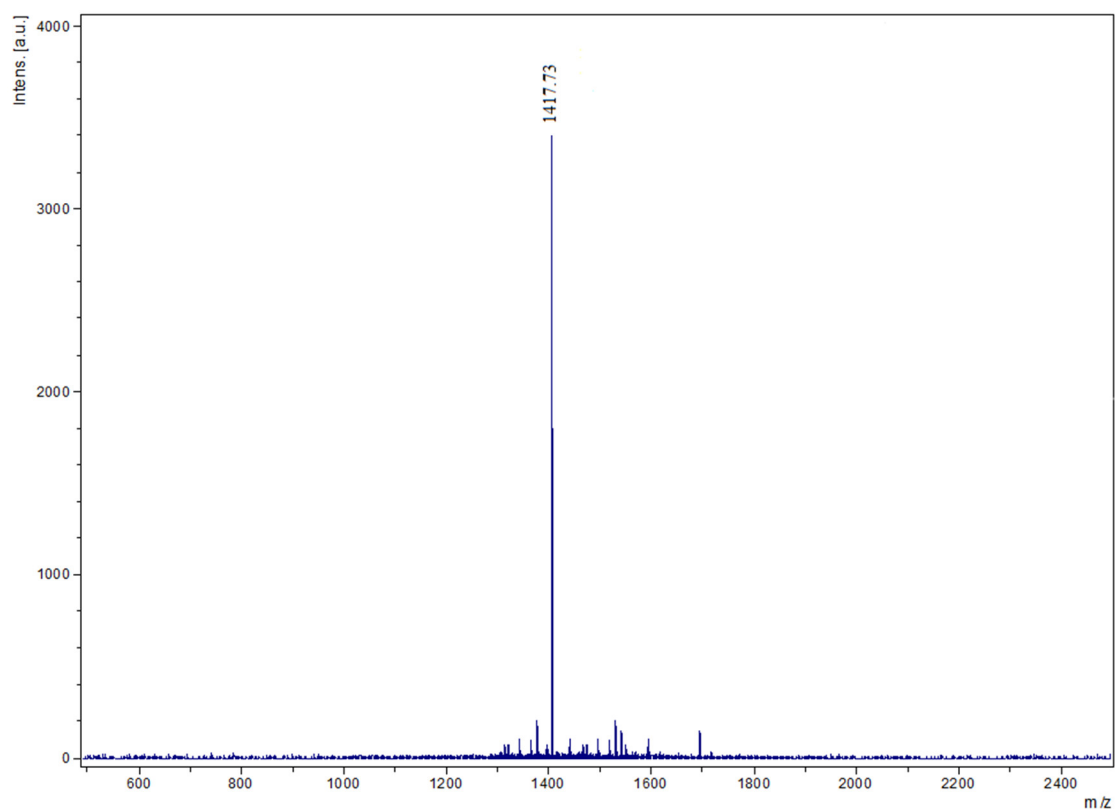

**Figure S2.** Mass spectrum of AK1<sup>9-23</sup> (KIIFVVGGPGSGKGT).

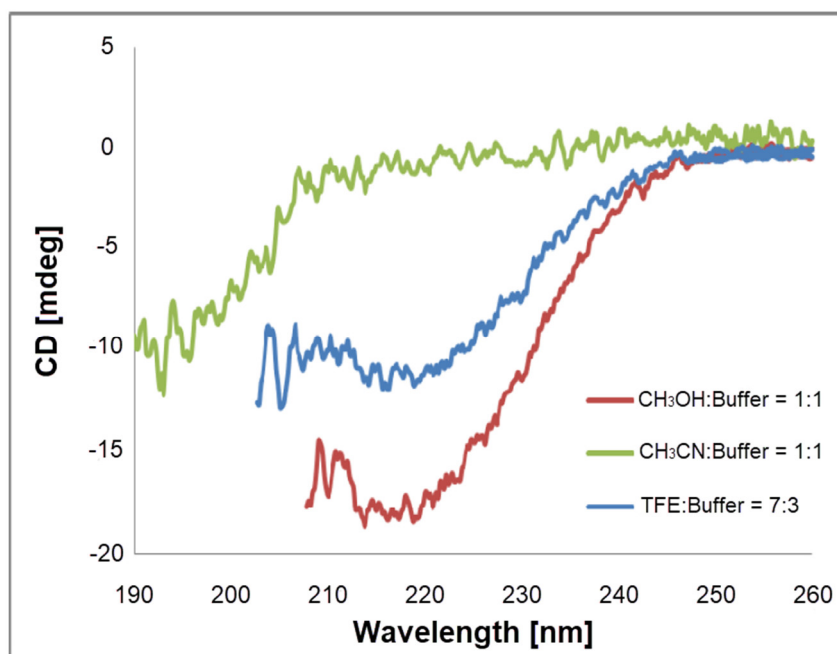

**Figure S3.** Signature CD spectra demonstrating the effect of different solvent systems on the secondary structure of the AK1<sup>9-23</sup> (KIIFVVGGPGSGKGT).

### Characterization of AK1<sub>37-51</sub> (LSTGDLLRSEVSSGS)

Subsequently, the HPLC chromatogram revealed a sharp AK1<sub>37-51</sub> peak at a retention time of ~2.4 min and purity was calculated to be ~72% as compared to standards (Figure S4). The reported m/z value of AK1<sub>37-51</sub> was observed at 1,507.63 g·mol<sup>-1</sup> (Figure S5). The proportion of the sequence was assumed random-coil or  $\alpha$ -helix secondary structure in the different solvent environments, showing a general predominance of random-coil and  $\alpha$ -helix conformation (Figure S6).

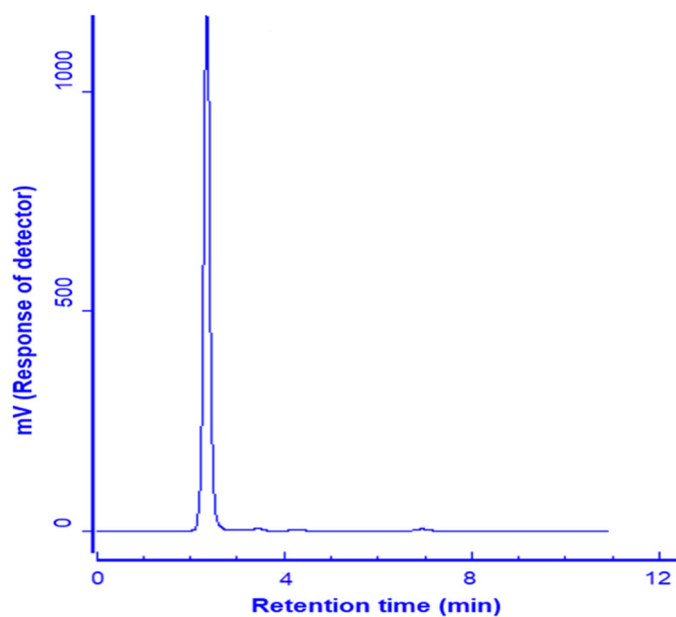

Figure S4. HPLC chromatogram of AK1<sub>37-51</sub> (LSTGDLLRSEVSSGS).

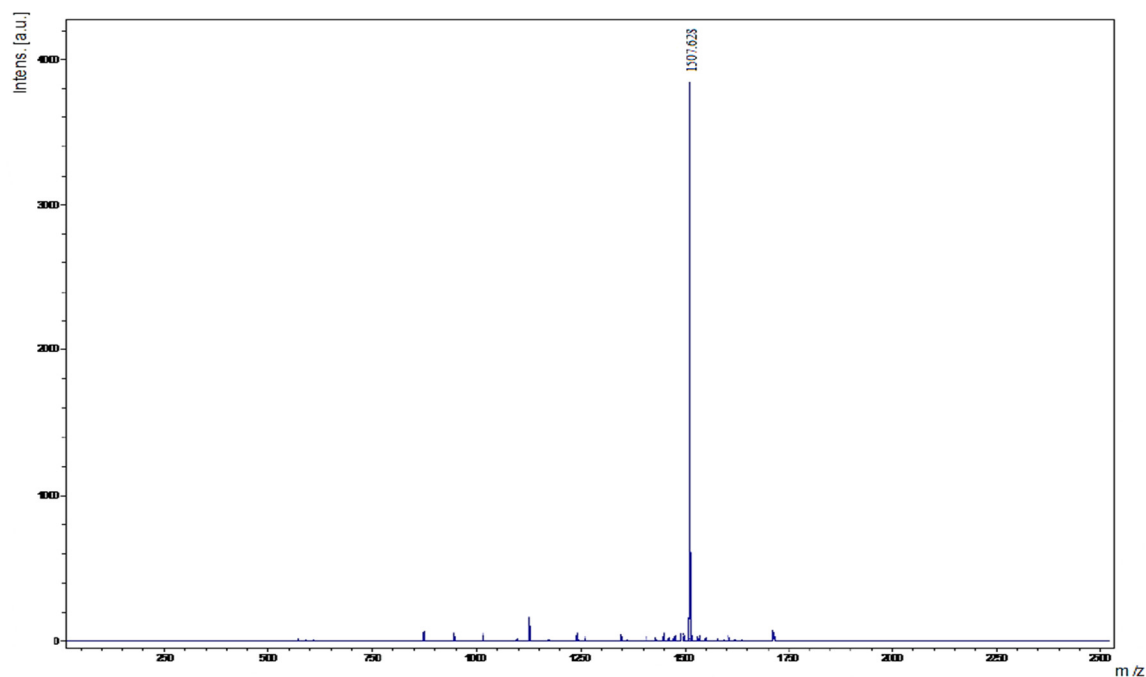

Figure S5. Mass spectrum of AK1<sub>37-51</sub> (LSTGDLLRSEVSSGS).

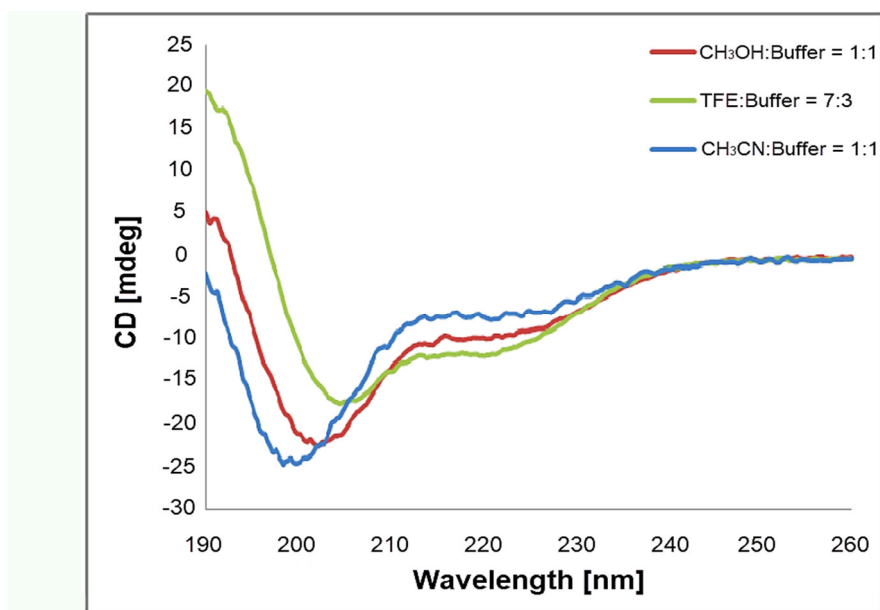

**Figure S6.** Signature CD spectra demonstrating the effect of different solvent systems on the secondary structure of the AK1<sub>37-51</sub> (LSTGDLLRSEVSSGS).

#### **Characterization of AK1<sub>69-83</sub> (LETVLDMLRDAMVAK)**

Next, the purity of AK1<sub>69-83</sub> was monitored by HPLC equipped with an RP-18 at a flow rate of 1 mL/min. Sharp peak was observed at a retention time of ~3.5 min (Figure S7); **this peptide's purity was calculated to be ~80% as compared to standards.** The reported m/z value of AK1<sub>69-83</sub> was observed at **1,705.07 g·mol<sup>-1</sup>** (Figure S8). The proportion of the sequence **assumed** random-coil or  $\alpha$ -helix secondary structure in the different solvent environments, showing a general predominance of random-coil and  $\alpha$ -helix conformation (Figure S9).

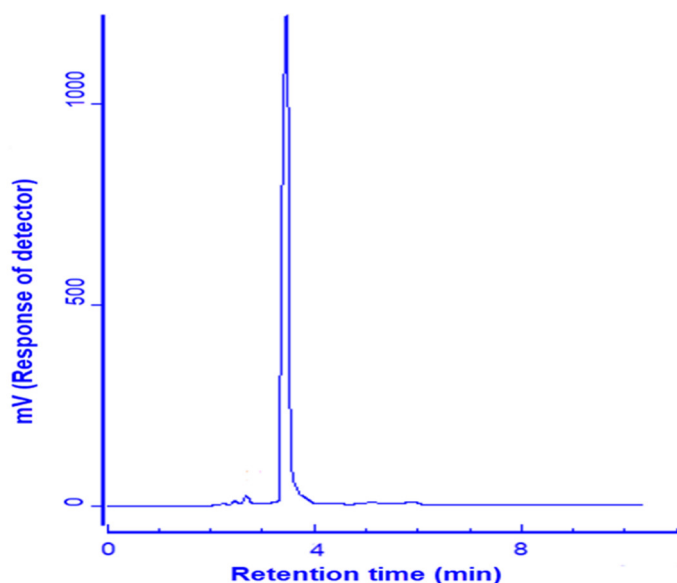

**Figure S7.** HPLC chromatogram of AK1<sub>69-83</sub> (LETVLDMLRDAMVAK).

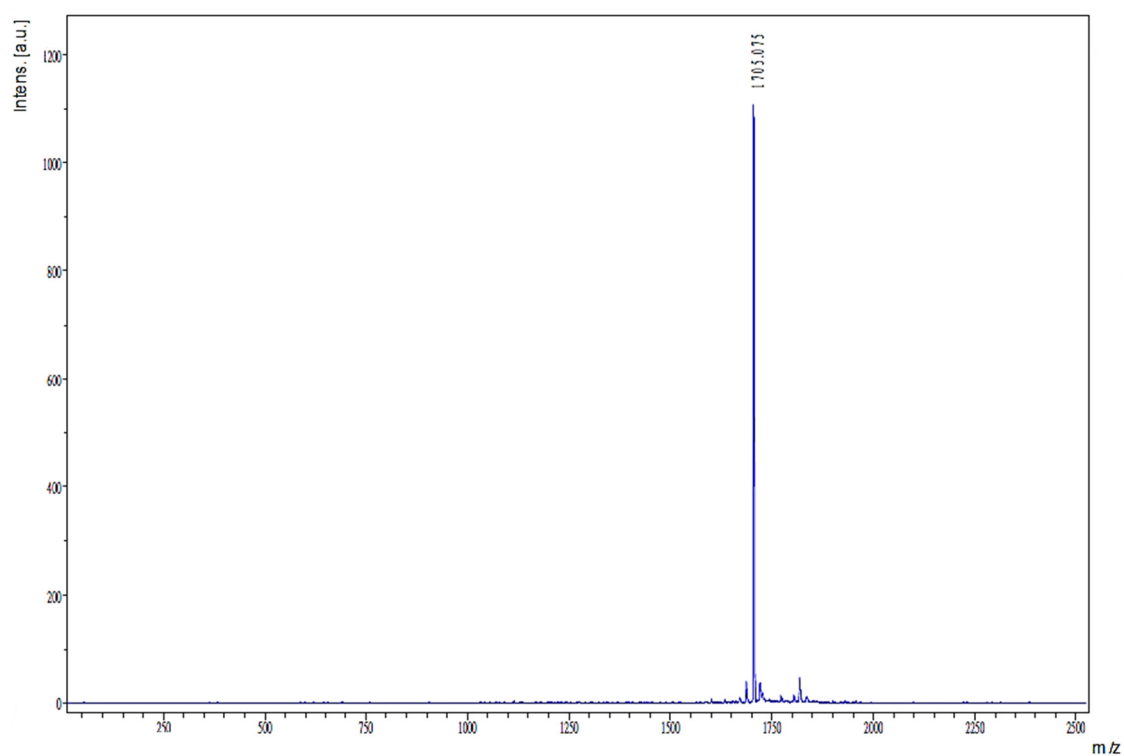

**Figure S8.** Mass spectrum of AK1<sub>69-83</sub> (LETVLDMLRDAMVAK).

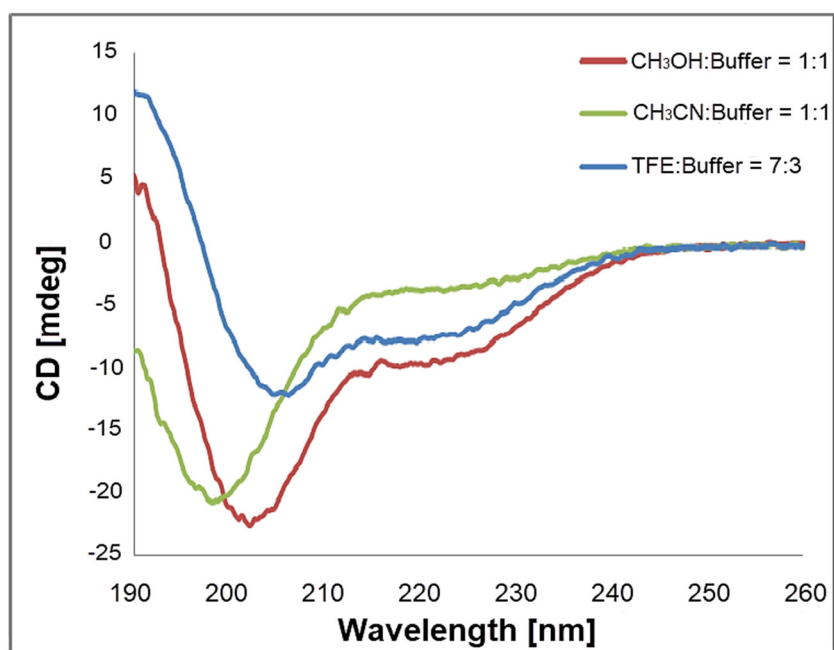

**Figure S9.** Signature CD spectra demonstrating the effect of different solvent systems on the secondary structure of the AK1<sub>69-83</sub> (LETVLDMLRDAMVAK).

### Characterization of AK<sub>107-121</sub> (RRIGQPTLLLYVDAG)

Then, the HPLC chromatogram revealed a sharp AK<sub>107-121</sub> peak at a retention time of ~2.1 min and purity was calculated to be ~78% as compared to standards (Figure S10). The reported m/z value of AK<sub>107-121</sub> was observed at 1,671.92 g·mol<sup>-1</sup> (Figure S11). The CD analysis of synthetic AK<sub>107-121</sub> segment in aqueous solution showed a typical spectrum of disordered structure. The 70% TFE used in the special solvent system exhibited spectral deviation from  $\beta$ -sheet to  $\alpha$ -helix conformation when compared to 30% TFE used in this system (Figure S12). The proportion of the sequence was assumed  $\alpha$ -helical,  $\beta$ -sheet, or random-coil secondary structure in the different environments. The results show a general predominance of random-coil,  $\alpha$ -helix, and  $\beta$ -sheet conformation.

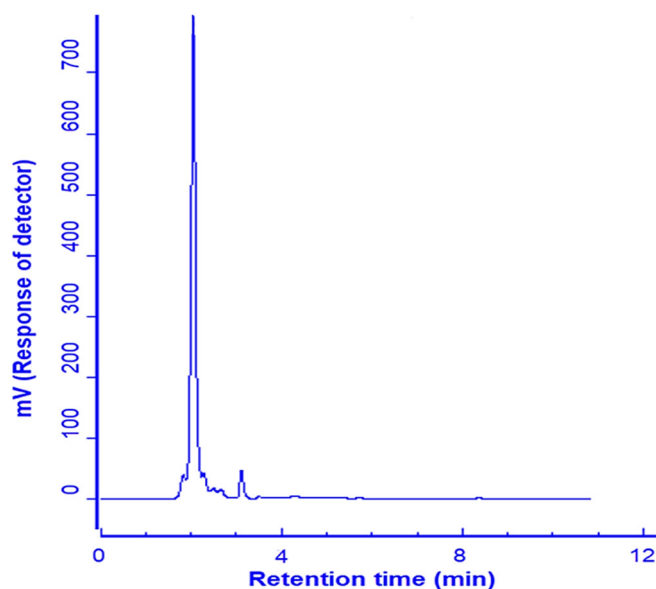

Figure S10. HPLC chromatogram of AK<sub>107-121</sub> (RRIGQPTLLLYVDAG).

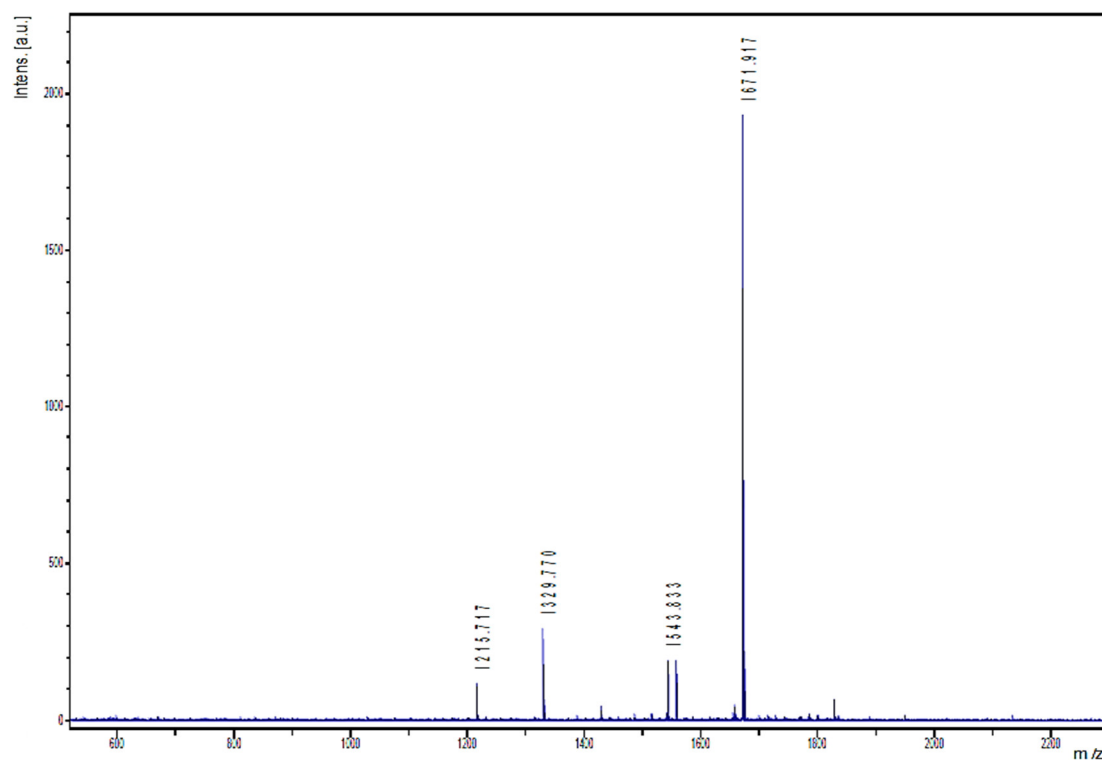

**Figure S11.** Mass spectrum of AK1<sub>107-121</sub> (RRIGQPTLLLYVDAG).

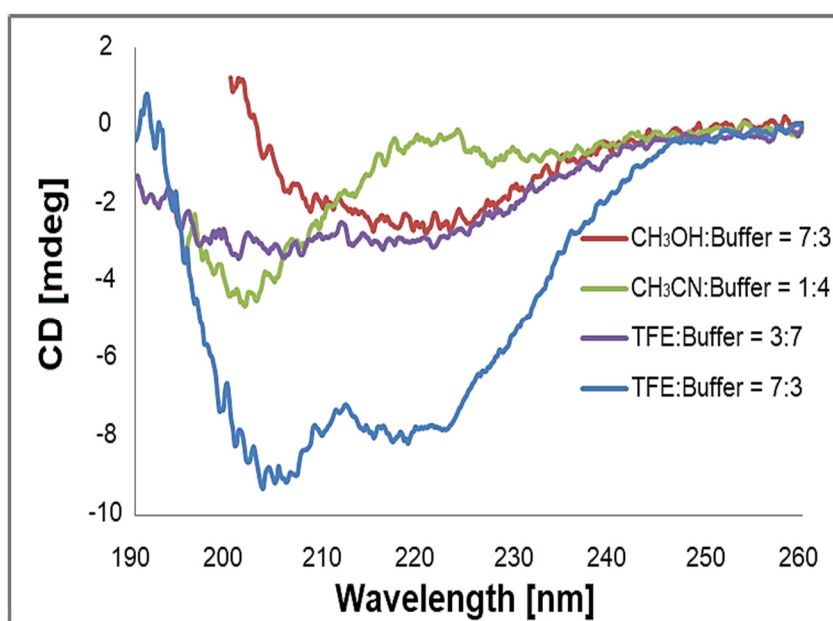

**Figure S12.** Signature CD spectra demonstrating the effect of different solvent systems on the secondary structure of the AK1<sub>107-121</sub> (RRIGQPTLLLYVDAG).
